# Supplementary material
Source: PubMed Central journal article supplement (PMC3438840)
Supplement: Supp_Fig1.pdf [file Supp_Fig1.pdf]

## Supplementary Data

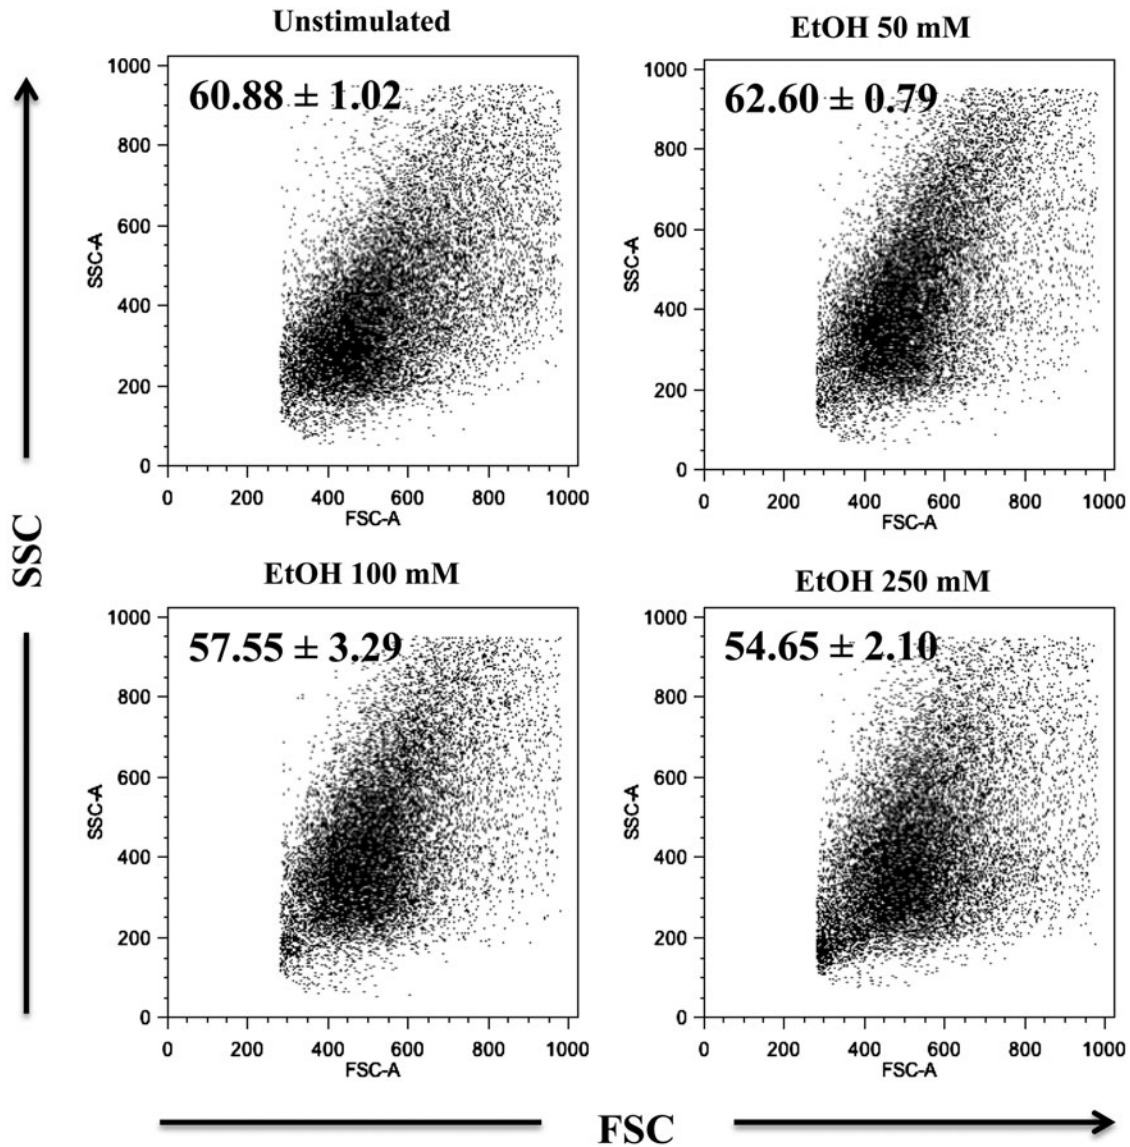

**SUPPLEMENTARY FIG. S1.** Ethanol exposure did not influence the percentage of live cells. Bone marrow-derived dendritic cells ( $2 \times 10^6$  cell/well) were cultured in 96-well plates in the presence or absence of varying concentrations of ethanol for 24 h at 37°C. The cells were harvested, and cell suspensions were analyzed for cell viability by flow cytometry. Representative FACS plots were taken from a single animal and demonstrate the percentage of viable cells within the live gate of total events collected. Numbers indicate the mean percentage of cells in the live gate  $\pm$  SEM,  $n=4$ .  $P>0.05$ .
